# Supplementary material
Source: HighWire-hosted journal article supplement (https://rapm.bmj.com/content/rapm-2022-104097)
Supplement: inline-supplementary-material-1 [file inline-supplementary-material-1.pdf]

**Supplemental File 1: Diagnostic parameters estimated based on published studies**

|                                                                              | <b>Sensitivity<br/>95% CI</b> | <b>Specificity<br/>95% CI</b> | <b>+ predictive<br/>value 95%<br/>CI</b> | <b>- predictive<br/>value 95% CI</b> |
|------------------------------------------------------------------------------|-------------------------------|-------------------------------|------------------------------------------|--------------------------------------|
| <i>RCTs (assuming all trial failures as true negatives)</i>                  | 100%                          | 53%<br>(48%-57%)              | 65%<br>(61%-69%)                         | 100%                                 |
| <i>RCTs (assuming 50% trial failures as true negatives)</i>                  | 77%<br>(73%-81%)              | 35%<br>(30%-41%)              | 65%<br>(61%-69%)                         | 50%<br>(43%-56%)                     |
| <i>Observational studies (assuming all trial failures as true negatives)</i> | 100%                          | 36%<br>(23%-49%)              | 61%<br>(50%-72%)                         | 100%                                 |
| <i>Observational studies (assuming all trial failures as true negatives)</i> | 85%<br>(76%-94%)              | 22%<br>(9%-35%)               | 61%<br>(50%-72%)                         | 50%<br>(27%-73%)                     |

CI, confidence interval; RCT, randomized controlled trial

**Supplemental File 2: Differences between permanent and temporary lead trials**

| <b>Factors considered</b>                                                                                         | <b>Permanent lead trial*</b>                                                                                                                                | <b>Temporary lead trial</b>                                                                                                                             |
|-------------------------------------------------------------------------------------------------------------------|-------------------------------------------------------------------------------------------------------------------------------------------------------------|---------------------------------------------------------------------------------------------------------------------------------------------------------|
| <i>Approach</i>                                                                                                   | Cylindrical leads anchored and tunneled during the trial, inserted with the intent to continue for therapy after a successful trial by connecting to an IPG | Cylindrical leads inserted with an intent to discard after the trial, and followed by insertion of another set of leads connected to an IPG for therapy |
| <i>Difference in trial success rate</i>                                                                           | No relative difference                                                                                                                                      | No relative difference                                                                                                                                  |
| <i>Time for insertion</i>                                                                                         | Relatively higher                                                                                                                                           | Relatively lower                                                                                                                                        |
| <i>Infection risk</i>                                                                                             | Potentially higher                                                                                                                                          | Lower                                                                                                                                                   |
| <i>Patient discomfort or pain post procedure</i>                                                                  | Potentially higher                                                                                                                                          | Lower                                                                                                                                                   |
| <i>Lead migration risk</i>                                                                                        | Lower                                                                                                                                                       | Potentially higher                                                                                                                                      |
| <i>Conduct of the trial</i>                                                                                       | Requires operating room                                                                                                                                     | Can be considered outside the operating room                                                                                                            |
| <i>Overall radiation exposure</i>                                                                                 | Lower                                                                                                                                                       | Higher (considering additional final phase implant)                                                                                                     |
| <i>* It does not apply to wireless trials in which there is no separate IPG; IPG: implantable pulse generator</i> |                                                                                                                                                             |                                                                                                                                                         |
