# Supplementary material
Source: HighWire-hosted journal article supplement (https://rapm.bmj.com/content/rapm-2022-104097)
Supplement: inline-supplementary-material-2 [file inline-supplementary-material-2.pdf]

# Evidence-Based Guidelines on Patient Selection and Trial Stimulation for Spinal Cord Stimulation (SCS) Therapy for Chronic Pain

Developed by ASRA Pain Medicine in collaboration with ESRA, NANS, and IoN

15-member guidelines panel with multidisciplinary representation from anesthesiology, physical medicine and rehabilitation, neurosurgery, psychology, epidemiology, and a patient partner

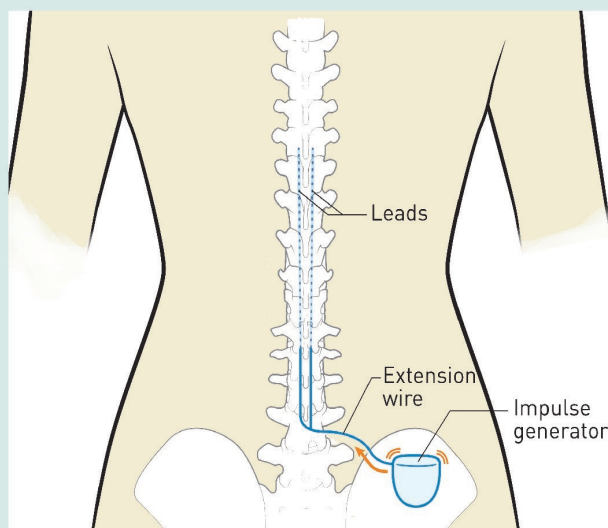

## Patient Selection and the Need for Trial

USPSTF Grading; Level of Certainty

## Trial Conduct and Evaluation

USPSTF Grading; Level of Certainty

**Grade B**  
(moderate certainty):

A trial should be performed before offering a definitive SCS implant.

**Grade B**  
(moderate certainty):

Use percutaneous approach with attempts to capture paresthesia\* in >80% of pain areas (\*paresthesia-based stimulation).

**Grade B**  
(moderate certainty):

Do not consider an on-table trial equivalent to a traditional SCS trial.

**Grade D**  
(moderate certainty):

Avoid placement of trial leads under GA and a trial duration of >10 days.

**Grade B**  
(low certainty):

Screen all patients for high-risk psychosocial factors before offering SCS therapy.

**Grade A**  
(high certainty):

Administer prophylactic antibiotic for all patients having SCS trials.

**Grade B**  
(moderate certainty):

Use individualized approach to set realistic expectations regarding trial outcomes.

**Grade B**  
(moderate certainty):

Evaluate a trial for pain relief, functional improvement, stable or decreased analgesic use, and overall satisfaction.

**Grade C**  
(moderate certainty):

Disclose higher failure and complications risk in patients with high BMI, smokers, high opioid doses (>90 mg of morphine/day).

**Grade A**  
(high certainty):

Consider ≥50% pain relief for trial success.

**Grade C**  
(low certainty):

If pain improvement is <50%, look for substantial changes in functions or analgesic use.

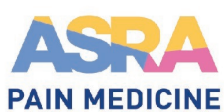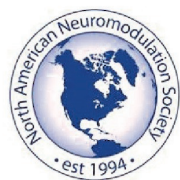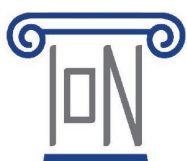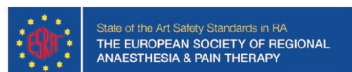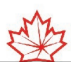

THE CANADIAN PAIN SOCIETY  
LA SOCIÉTÉ CANADIENNE DE LA DOULEUR
